# Supplementary material for: Evaluation of reference genes for gene expression in red-tailed phascogale (Phascogale calura) liver, lung, small intestine and spleen
Source: PeerJ. 2016 Oct 13;4:e2552. doi: 10.7717/peerj.2552 (PMC5068414; doi:10.7717/peerj.2552)
Supplement: Supplemental Information 4 [file peerj-04-2552-s009.xlsx]

## Sheet: 28S
Excel Analysed Data Export
Copyright (c) 2013 QIAGEN GmbH. All Rights Reserved.
File	Liver SC_new.rex
Date	2015-07-27
Time	13:49:54
Operator	Oselyne
Run Id
Notes
Machine Serial No	512266
Channel	Gain
Green	8.66667
Yellow	5
Orange	5
Red	5
Crimson	7
HRM	7
Channel	Threshold
Cycling A.Green (Page 1)	0.055
Quantitative analysis of Cycling A.Green (Page 1)
No.	Color	Name	Type	Ct	Ct Comment	Given Conc (Copies)	Calc Conc (Copies)	% Var	Rep. Ct	Rep. Ct Std. Dev.	Rep. Ct (95% CI)	Rep. Calc. Conc.	Rep. Calc. Conc. (95% CI)
1	255	28S liver 1_SC	Standard	13.15		625	625	0	13.21	0.08	[13.02 , 13.40]	599	[466 , 771]
2	255	28S liver 1_SC	Standard	13.3		625	568	0.092
3	255	28S liver 1_SC	Standard	13.19		625	606	0.03
4	8388736	28S liver 2_SC	Standard	15.49		125	140	0.121	15.55	0.1	[15.30 , 15.80]	135	[113 , 162]
5	8388736	28S liver 2_SC	Standard	15.49		125	141	0.125
6	8388736	28S liver 2_SC	Standard	15.67		125	126	0.004
7	8421376	28S liver 3_SC	Standard	18.24		25	24	0.022	18.31	0.11		23	[20 , 27]
8	8421376	28S liver 3_SC	Standard	18.39		25	22	0.114
9	16711935	28S liver 4_SC	Standard	20.78		5	5	0.03	20.69	0.08	[20.49 , 20.88]	5	[4 , 6]
10	16711935	28S liver 4_SC	Standard	20.65		5	5	0.052
11	16711935	28S liver 4_SC	Standard	20.64		5	5	0.062
12	9364598	28S liver 5_SC	Standard	23.23		1	1	0.016	23.3	0.09		1	[1 , 1]
13	9364598	28S liver 5_SC	Standard	23.36		1	1	0.062
14	1	28S Liver #1	Unknown	21.13					21.28	0.13	[20.95 , 21.60]
15	1	28S Liver #1	Unknown	21.38
16	1	28S Liver #1	Unknown	21.33
17	2	28S Liver #2	Unknown	9.87					9.83	0.06	[9.69 , 9.97]
18	2	28S Liver #2	Unknown	9.86
19	2	28S Liver #2	Unknown	9.77
20	3	28S Liver #3	Unknown	11.14					11.2	0.14	[10.86 , 11.54]
21	3	28S Liver #3	Unknown	11.1
22	3	28S Liver #3	Unknown	11.35
23	4	28S Liver #4	Unknown	19.28					19.23	0.27	[18.57 , 19.90]
24	4	28S Liver #4	Unknown	18.95
25	4	28S Liver #4	Unknown	19.48
26	5	28S Liver #5	Unknown	18.16					18.31	0.25	[17.68 , 18.93]
27	5	28S Liver #5	Unknown	18.6
28	5	28S Liver #5	Unknown	18.16
29	6	28S Liver #6	Unknown	11.25					11.01	0.39	[10.03 , 11.99]
30	6	28S Liver #6	Unknown	11.22
31	6	28S Liver #6	Unknown	10.55
32	7	28S liver #7	Unknown	17.41					17.66	0.23	[17.09 , 18.22]
33	7	28S liver #7	Unknown	17.85
34	7	28S liver #7	Unknown	17.72
35	8	28S Liver #8	Unknown	13.15					13.21	0.08	[13.02 , 13.40]
36	8	28S Liver #8	Unknown	13.3
37	8	28S Liver #8	Unknown	13.19
38	9	28S liver #9	Unknown	17.3					17.03	0.23	[16.45 , 17.61]
39	9	28S liver #9	Unknown	16.9
40	9	28S liver #9	Unknown	16.89
41	10	28S liver #10	Unknown	15					15.06	0.11	[14.80 , 15.33]
42	10	28S liver #10	Unknown	15
43	10	28S liver #10	Unknown	15.18
44	11	28S Liver NTC_SC	NTC	34.99					34.9	0.13
45	11	28S Liver NTC_SC	NTC	34.81
46	11	28S Liver NTC_SC	NTC
47	255	28S Lung 1_SC	Standard	18.01		625	663	0.061	18.07	0.06	[17.93 , 18.22]	636	[312 , 1,298]
48	255	28S Lung 1_SC	Standard	18.09		625	628	0.005
49	255	28S Lung 1_SC	Standard	18.12		625	617	0.012
50	8388736	28S Lung 2_SC	Standard	20.22		125	158	0.267	20.26	0.05		155	[91 , 263]
51	8388736	28S Lung 2_SC	Standard	20.29		125	151	0.209
52	8421376	28S Lung 3_SC	Standard	23.56		25	18	0.269	23.63	0.11		17	[11 , 28]
53	8421376	28S Lung 3_SC	Standard	23.71		25	17	0.336
54	16711935	28S Lung 4_SC	Standard	25.44		5	5	0.083	25.6	0.22		5	[3 , 9]
55	16711935	28S Lung 4_SC	Standard	25.76		5	4	0.117
56	9364598	28S Lung 5_SC	Standard	27.9		1	1	0.105	27.83	0.1		1	[1 , 3]
57	9364598	28S Lung 5_SC	Standard	27.76		1	1	0.207
58	11	28S lung #1	Unknown	17.33					17.73	0.44	[16.64 , 18.83]
59	11	28S lung #1	Unknown	18.21
60	11	28S lung #1	Unknown	17.66
61	12	28S lung #2	Unknown	11.19					11.38	0.23	[10.81 , 11.95]
62	12	28S lung #2	Unknown	11.32
63	12	28S lung #2	Unknown	11.63
64	13	28S lung #3	Unknown	17.03					17.14	0.1	[16.88 , 17.40]
65	13	28S lung #3	Unknown	17.15
66	13	28S lung #3	Unknown	17.24
67	22	28S lung #4	Unknown	12.91					13.14	0.21	[12.63 , 13.66]
68	22	28S lung #4	Unknown	13.3
69	22	28S lung #4	Unknown	13.22
70	33	28S lung #5	Unknown	11.3					11.63	0.29	[10.90 , 12.36]
71	33	28S lung #5	Unknown	11.71
72	33	28S lung #5	Unknown	11.88
73	44	28S lung #6	Unknown	10.73					10.8	0.11	[10.52 , 11.08]
74	44	28S lung #6	Unknown	10.93
75	44	28S lung #6	Unknown	10.74
76	55	28S lung #7	Unknown	20.09					20.14	0.06
77	55	28S lung #7	Unknown	20.18
78	66	28S lung #8	Standard	18.01					18.07	0.06	[17.93 , 18.22]
79	66	28S lung #8	Standard	18.09
80	66	28S lung #8	Standard	18.12
81	77	28S lung #9	Unknown	12.35					12.36	0.21	[11.84 , 12.88]
82	77	28S lung #9	Unknown	12.57
83	77	28S lung #9	Unknown	12.16
84	88	28S lung #10	Unknown	12.66					12.37	0.35	[11.50 , 13.23]
85	88	28S lung #10	Unknown	11.98
86	88	28S lung #10	Unknown	12.46
87	99	28S_NTC	NTC	34.69					34.69
88	255	28S GIT 1_SC	Standard	14.34		625	696	0.114	14.55	0.2	[14.07 , 15.04]	622	[394 , 982]
89	255	28S GIT 1_SC	Standard	14.59		625	608	0.027
90	255	28S GIT 1_SC	Standard	14.72		625	568	0.092
91	8388736	28S GIT 2_SC	Standard	17.47		125	132	0.053	17.43	0.05	[17.31 , 17.55]	135	[97 , 187]
92	8388736	28S GIT 2_SC	Standard	17.37		125	138	0.107
93	8388736	28S GIT 2_SC	Standard	17.44		125	134	0.07
94	8421376	28S GIT 3_SC	Standard	20.63		25	24	0.021	20.89	0.3	[20.15 , 21.63]	21	[16 , 28]
95	8421376	28S GIT 3_SC	Standard	20.83		25	22	0.121
96	8421376	28S GIT 3_SC	Standard	21.21		25	18	0.283
97	16711935	28S GIT 4_SC	Standard	23.28		5	6	0.191	23.38	0.11	[23.11 , 23.66]	6	[4 , 8]
98	16711935	28S GIT 4_SC	Standard	23.5		5	5	0.06
99	16711935	28S GIT 4_SC	Standard	23.36		5	6	0.144
100	9364598	28S GIT 5_SC	Standard	26.73		1	1	0.051	26.69	0.06	[26.53 , 26.85]	1	[1 , 2]
101	9364598	28S GIT 5_SC	Standard	26.62		1	1	0.009
102	9364598	28S GIT 5_SC	Standard	26.72		1	1	0.045
103	11	28S GIT #1	Unknown	16.92					17.5	0.61	[15.99 , 19.01]	17	[12 , 24]
104	11	28S GIT #1	Unknown	17.45
105	11	28S GIT #1	Unknown	18.13
106	22	28S GIT #2	Unknown	15.15					15.02	0.22	[14.47 , 15.58]
107	22	28S GIT #2	Unknown	14.76
108	22	28S GIT #2	Unknown	15.15
109	33	28S GIT #3	Unknown	12.19					12.32	0.15	[11.95 , 12.69]
110	33	28S GIT #3	Unknown	12.48
111	33	28S GIT #3	Unknown	12.29
112	44	28S GIT #4	Unknown	16.79					16.7	0.13
113	44	28S GIT #4	Unknown	16.6
114	55	28S GIT #5	Unknown	15.79					15.76	0.25	[15.15 , 16.37]
115	55	28S GIT #5	Unknown	15.5
116	55	28S GIT #5	Unknown	15.99
117	66	28S GIT #6	Unknown	14.49					14.42	0.09
118	66	28S GIT #6	Unknown	14.35
119	77	28S GIT #7	Unknown	15.42					15.45	0.04
120	77	28S GIT #7	Unknown	15.48
121	88	28S GIT #8	Standard	14.34					14.55	0.2	[14.07 , 15.04]
122	88	28S GIT #8	Standard	14.59
123	88	28S GIT #8	Standard	14.72
124	99	28S GIT #9	Unknown	13.02					13.51	0.47	[12.35 , 14.66]
125	99	28S GIT #9	Unknown	13.95
126	99	28S GIT #9	Unknown	13.55
127	100	28S GIT #10	Unknown	14.78					15.17	0.56
128	100	28S GIT #10	Unknown	15.57
129	51400	28S GIT NTC_SC	NTC	32.62					32.62				[ , ]
130	51400	28S GIT NTC_SC	NTC
131	255	28S spleen 1_SC	Standard	16		625	562	0.101	15.87	0.16	[15.48 , 16.26]	614	[341 , 1,104]
132	255	28S spleen 1_SC	Standard	15.92		625	595	0.049
133	255	28S spleen 1_SC	Standard	15.7		625	692	0.107
134	8388736	28S spleen 2_SC	Standard	18.24		125	122	0.023	18.23	0.01		123	[81 , 185]
135	8388736	28S spleen 2_SC	Standard	18.23		125	123	0.015
136	8421376	28S spleen 3_SC	Standard	20.98		25	19	0.246	20.56	0.42	[19.51 , 21.61]	25	[18 , 35]
137	8421376	28S spleen 3_SC	Standard	20.13		25	34	0.341
138	8421376	28S spleen 3_SC	Standard	20.57		25	25	0.005
139	16711935	28S spleen 4_SC	Standard	22.76		5	6	0.12	22.77	0.21	[22.24 , 23.30]	6	[4 , 9]
140	16711935	28S spleen 4_SC	Standard	22.56		5	6	0.284
141	16711935	28S spleen 4_SC	Standard	22.98		5	5	0.04
142	9364598	28S spleen 5_SC	Standard	25.3		1	1	0.01	25.46	0.22		1	[ , 2]
143	9364598	28S spleen 5_SC	Standard	25.61		1	1	0.201
144	11	28S spleen #1	Unknown	16.95					16.97	0.04
145	11	28S spleen #1	Unknown	17
146	22	28S spleen #2	Unknown	16.92					16.8	0.15	[16.43 , 17.17]
147	22	28S spleen #2	Unknown	16.63
148	22	28S spleen #2	Unknown	16.84
149	33	28S spleen #3	Unknown	17.53					17.51	0.36	[16.60 , 18.42]
150	33	28S spleen #3	Unknown	17.86
151	33	28S spleen #3	Unknown	17.13
152	44	28S spleen #4	Unknown	17.02					16.99	0.27	[16.32 , 17.67]
153	44	28S spleen #4	Unknown	17.25
154	44	28S spleen #4	Unknown	16.71
155	55	28S spleen #5	Unknown	17.4					17.59	0.29	[16.87 , 18.30]
156	55	28S spleen #5	Unknown	17.92
157	55	28S spleen #5	Unknown	17.45
158	66	28S spleen #6	Unknown	14.91					14.8	0.15	[14.43 , 15.16]
159	66	28S spleen #6	Unknown	14.63
160	66	28S spleen #6	Unknown	14.85
161	77	28S spleen #7	Unknown	16.61					16.44	0.23	[15.87 , 17.02]
162	77	28S spleen #7	Unknown	16.55
163	77	28S spleen #7	Unknown	16.18
164	88	28S spleen #8	Unknown	16					15.87	0.16	[15.48 , 16.26]
165	88	28S spleen #8	Unknown	15.92
166	88	28S spleen #8	Unknown	15.7
167	99	28S spleen #9	Unknown	16.86					16.82	0.46	[15.67 , 17.96]
168	99	28S spleen #9	Unknown	16.34
169	99	28S spleen #9	Unknown	17.26
170	100	28S spleen #10	Unknown	16.84					16.94	0.22	[16.39 , 17.49]
171	100	28S spleen #10	Unknown	17.19
172	100	28S spleen #10	Unknown	16.78
