# Supplementary material for: Evaluation of reference genes for gene expression in red-tailed phascogale (Phascogale calura) liver, lung, small intestine and spleen
Source: PeerJ. 2016 Oct 13;4:e2552. doi: 10.7717/peerj.2552 (PMC5068414; doi:10.7717/peerj.2552)
Supplement: Supplemental Information 5 [file peerj-04-2552-s010.xlsx]

## Sheet: 13A
Excel Analysed Data Export
Copyright (c) 2013 QIAGEN GmbH. All Rights Reserved.
File	Liver SC.rex
Date	2015-07-23
Time	16:20:48
Operator
Run Id
Notes
Machine Serial No	512266
Channel	Gain
Green	9.66667
Yellow	5
Orange	5
Red	5
Crimson	7
HRM	7
Channel	Threshold
Cycling A.Green (Page 1)	0.055
Quantitative analysis of Cycling A.Green (Page 1)
No.	Color	Name	Type	Ct	Ct Comment	Given Conc (Copies)	Calc Conc (Copies)	% Var	Rep. Ct	Rep. Ct Std. Dev.	Rep. Ct (95% CI)	Rep. Calc. Conc.	Rep. Calc. Conc. (95% CI)
1	255	13A liver 1_SC	Standard	26.07		625	520	0.167	26.11	0.16	[25.72 , 26.51]	507	[156 , 1,650]
2	255	13A liver 1_SC	Standard	26.29		625	455	0.272
3	255	13A liver 1_SC	Standard	25.98		625	549	0.122
4	8388736	13A liver 2_SC	Standard	27.48		125	219	0.754	27.72	0.35		188	[75 , 472]
5	8388736	13A liver 2_SC	Standard	27.97		125	162	0.295
6	8421376	13A liver 3_SC	Standard	30.49		25	34	0.373	30.8	0.44		28	[11 , 71]
7	8421376	13A liver 3_SC	Standard	31.11		25	23	0.063
8	16711935	13A liver 4_SC	Standard	34.65		5	3	0.469	33.97	0.95		4	[1 , 18]
9	16711935	13A liver 4_SC	Standard	33.3		5	6	0.212
10	11	13A liver #1	Unknown	28.52					28.59	0.3	[27.85 , 29.33]
11	11	13A liver #1	Unknown	28.91
12	11	13A liver #1	Unknown	28.33
13	22	13A liver #2	Unknown	26.4					26.34	0.09
14	22	13A liver #2	Unknown	26.27
15	33	13A liver #3	Unknown	22.76					22.61	0.21
16	33	13A liver #3	Unknown	22.46
17	44	13A liver #4	Unknown	28.67					28.84	0.24
18	44	13A liver #4	Unknown	29.02
19	55	13A liver #5	Unknown	22.22					22.27	0.07
20	55	13A liver #5	Unknown	22.32
21	66	13A liver #6	Unknown	31.36					31.34	0.26	[30.69 , 31.98]
22	66	13A liver #6	Unknown	31.59
23	66	13A liver #6	Unknown	31.07
24	77	13A liver #7	Unknown	29.84					29.72	0.17
25	77	13A liver #7	Unknown	29.6
26	88	13A liver #8	Unknown	26.07					26.11	0.16	[25.72 , 26.51]	507	[156 , 1,650]
27	88	13A liver #8	Unknown	26.29
28	88	13A liver #8	Unknown	25.98
29	99	13A liver #9	Unknown	33.34					33.19	0.21
30	99	13A liver #9	Unknown	33.04
31	100	13A liver #10	Unknown	30.03					30.06	0.03
32	100	13A liver #10	Unknown	30.08
33	255	13A lung 1_SC	Standard	22.01		625	654	0.047	22.1	0.13		620	[346 , 1,113]
34	255	13A lung 1_SC	Standard	22.19		625	588	0.059
35	8388736	13A lung 2_SC	Standard	25.01		125	119	0.046	24.85	0.23		131	[89 , 192]
36	8388736	13A lung 2_SC	Standard	24.69		125	143	0.144
37	8421376	13A lung 3_SC	Standard	27.56		25	28	0.12	27.88	0.45		23	[16 , 35]
38	8421376	13A lung 3_SC	Standard	28.19		25	20	0.216
39	16711935	13A lung 4_SC	Standard	30.87		5	4	0.139	30.55	0.44		5	[3 , 9]
40	16711935	13A lung 4_SC	Standard	30.24		5	6	0.23
41	11	13A lung #1	Unknown	22.43					22.74	0.44
42	11	13A lung #1	Unknown	23.05
43	22	13A lung #2	Unknown	19.62					19.72	0.14
44	22	13A lung #2	Unknown	19.81
45	33	13A lung #3	Unknown	21.35					21.1	0.36
46	33	13A lung #3	Unknown	20.85
47	44	13A lung #4	Unknown	22.43					22.38	0.08
48	44	13A lung #4	Unknown	22.33
49	55	13A lung #5	Unknown	22.86					22.72	0.2
50	55	13A lung #5	Unknown	22.57
51	66	13A lung #6	Unknown	22.55					21.79	1.07
52	66	13A lung #6	Unknown	21.04
53	77	13A lung #7	Unknown	24.68					24.43	0.27	[23.76 , 25.10]
54	77	13A lung #7	Unknown	24.46
55	77	13A lung #7	Unknown	24.14
56	88	13A lung #8	Unknown	22.01					22.1	0.13
57	88	13A lung #8	Unknown	22.19
58	99	13A lung #9	Unknown	21.97					21.71	0.27	[21.03 , 22.38]
59	99	13A lung #9	Unknown	21.72
60	99	13A lung #9	Unknown	21.43
61	100	13A lung #10	Unknown	20.63					20.55	0.08	[20.34 , 20.75]
62	100	13A lung #10	Unknown	20.46
63	100	13A lung #10	Unknown	20.55
64	9364598	13A NTC	NTC	38.38					36.02	2.25	[30.43 , 41.60]		[ , 1]
65	9364598	13A NTC	NTC	35.76
66	9364598	13A NTC	NTC	33.91			1
67	255	13A GIT 1_SC	Standard	21.19		125	102	0.185	21.28	0.13		97	[34 , 277]
68	255	13A GIT 1_SC	Standard	21.36		125	92	0.266
69	8388736	13A GIT 2_SC	Standard	23.25		25	30	0.196	23.16	0.13		32	[14 , 69]
70	8388736	13A GIT 2_SC	Standard	23.07		25	33	0.33
71	8421376	13A GIT 3_SC	Standard	25.63		5	7	0.457	25.75	0.16		7	[3 , 14]
72	8421376	13A GIT 3_SC	Standard	25.86		5	6	0.269
73	16711935	13A GIT 4_SC	Standard	29.42		1	1	0.232	29.45	0.04		1	[ , 3]
74	16711935	13A GIT 4_SC	Standard	29.48		1	1	0.26
75	11	13A GIT #1	Unknown	28.35					28.53	0.21	[28.02 , 29.04]
76	11	13A GIT #1	Unknown	28.75
77	11	13A GIT #1	Unknown	28.5
78	22	13A GIT #2	Unknown	24.81					24.83	0.23	[24.27 , 25.39]
79	22	13A GIT #2	Unknown	25.07
80	22	13A GIT #2	Unknown	24.62
81	33	13A GIT #3	Unknown	21.67					21.24	0.43	[20.18 , 22.30]
82	33	13A GIT #3	Unknown	20.82
83	33	13A GIT #3	Unknown	21.24
84	44	13A GIT #4	Unknown	20.85					20.91	0.08
85	44	13A GIT #4	Unknown	20.97
86	55	13A GIT #5	Unknown	19.07					18.89	0.25
87	55	13A GIT #5	Unknown	18.72
88	66	13A GIT #6	Unknown	22.52					22.54	0.02
89	66	13A GIT #6	Unknown	22.55
90	77	13A GIT #7	Unknown	21.82					21.34	0.69
91	77	13A GIT #7	Unknown	20.85
92	88	13A GIT #8	Unknown	21.19					21.28	0.13
93	88	13A GIT #8	Unknown	21.36
94	99	13A GIT #9	Unknown	22.5					22.52	0.02
95	99	13A GIT #9	Unknown	22.54
96	100	13A GIT #10	Unknown	24.11					24.1	0.01
97	100	13A GIT #10	Unknown	24.09
98	255	13A spleen 1_SC	Standard	19.58		625	577	0.077	19.7	0.17		537	[252 , 1,147]
99	255	13A spleen 1_SC	Standard	19.82		625	501	0.199
100	8388736	13A spleen 2_SC	Standard	21.78		125	158	0.265	21.74	0.06		162	[90 , 291]
101	8388736	13A spleen 2_SC	Standard	21.7		125	166	0.326
102	8421376	13A spleen 3_SC	Standard	24.88		25	26	0.021	24.93	0.05	[24.81 , 25.05]	25	[16 , 38]
103	8421376	13A spleen 3_SC	Standard	24.94		25	25	0.016
104	8421376	13A spleen 3_SC	Standard	24.98		25	24	0.035
105	16711935	13A spleen 4_SC	Standard	28		5	4	0.184	27.89	0.15		4	[3 , 7]
106	16711935	13A spleen 4_SC	Standard	27.79		5	5	0.075
107	9364598	13A spleen 5_SC	Standard	29.78		1	1	0.43	30.33	0.53	[29.02 , 31.65]	1	[1 , 2]
108	9364598	13A spleen 5_SC	Standard	30.84		1	1	0.231
109	9364598	13A spleen 5_SC	Standard	30.38		1	1	0.002
110	11	13A spleen #1	Unknown	21.28					21.24	0.03	[21.16 , 21.33]
111	11	13A spleen #1	Unknown	21.25
112	11	13A spleen #1	Unknown	21.21
113	22	13A spleen #2	Unknown	19.45					19.25	0.18	[18.80 , 19.71]
114	22	13A spleen #2	Unknown	19.21
115	22	13A spleen #2	Unknown	19.1
116	33	13A spleen #3	Unknown	20.03					19.71	0.46
117	33	13A spleen #3	Unknown	19.38
118	44	13A spleen #4	Unknown	20.67					20.66	0.02
119	44	13A spleen #4	Unknown	20.65
120	55	13A spleen #5	Unknown	23.33					23.4	0.1
121	55	13A spleen #5	Unknown	23.47
122	66	13A spleen #6	Unknown	18.84					18.92	0.11
123	66	13A spleen #6	Unknown	19
124	77	13A spleen #7	Unknown	20.3					20.43	0.18	[19.99 , 20.88]
125	77	13A spleen #7	Unknown	20.64
126	77	13A spleen #7	Unknown	20.36
127	88	13A spleen #8	Unknown	19.58					19.7	0.17
128	88	13A spleen #8	Unknown	19.82
129	99	13A spleen #9	Unknown	21.81					21.63	0.16	[21.24 , 22.02]
130	99	13A spleen #9	Unknown	21.54
131	99	13A spleen #9	Unknown	21.53
132	100	13A spleen #10	Unknown	21.76					21.67	0.14
133	100	13A spleen #10	Unknown	21.57
